# Supplementary material for: Predictive value of IHR surveillance (C.5) and laboratory (C.2) capacities for national measles incidence: A 2011–2023 panel analysis of 14 West African countries
Source: Research Square preprint supplement (doi:10.21203/rs.3.rs-7000777/v1), 2025-07-29
Supplement: Supplementary file 1 [file 16d14198e36a17f640410bdf.docx]

**Supplementary Table S1.** Incidence-rate ratios (IRRs) and 95% confidence intervals (CIs) for SPAR C.2, SPAR C.5, and MCV1 in Models 1–3, original versus with country fixed effects

| **Model** | **Predictor** | **IRR (Orig)** | **95% CI (Orig)** | ***p* (Orig)** | **IRR (FE)** | **95% CI (FE)** |
| --- | --- | --- | --- | --- | --- | --- |
| Model 1 | SPAR C.2 (laboratory capacity) | 1.01 | [1.00, 1.02] | .007 | 1.01 | [1.00, 1.02] |
|  | MCV1 coverage (%) | 0.95 | [0.92, 0.98] | < .001 | 0.99 | [0.95, 1.04] |
| Model 2 | SPAR C.5 (surveillance  capacity) | 1.02 | [1.01, 1.03] | < .001 | 1.01 | [1.00, 1.02] |
|  | MCV1 coverage (%) | 0.95 | [0.92, 0.98] | < .001 | 0.99 | [0.95, 1.03] |
| Model 3 | SPAR C.2 (laboratory capacity) | 0.99 | [0.97, 1.01] | .325 | 1.00 | [0.99, 1.02] |
|  | SPAR C.5 (surveillance capacity) | 1.03 | [1.01, 1.04] | .006 | 1.01 | [0.99, 1.02] |
|  | MCV1 coverage (%) | 0.95 | [0.92, 0.98] | < .001 | 0.99 | [0.95, 1.03] |

Note: IRRs are exponentiated coefficients from negative binomial regression models predicting annual measles cases on SPAR laboratory capacity (C.2; Model 1), SPAR surveillance capacity (C.5; Model 2), and both SPAR predictors plus first-dose measles vaccine coverage (MCV1; Model 3), controlling for GDP per capita (per USD 1,000), health expenditure (% GDP), year fixed effects, and offset by log(total population). “Orig” denotes the original model; “FE” denotes the model with country fixed effects (factor(country)). CI = confidence interval; IRR = incidence-rate ratio; MCV1 = first-dose measles-containing vaccine coverage; SPAR = State Party Annual Reporting.

Supplementary Table S1 reports incidence-rate ratios (IRRs) and 95% confidence intervals (CIs) from three negative binomial regression models assessing the associations of SPAR laboratory capacity (C.2), SPAR surveillance capacity (C.5), and first-dose measles vaccine coverage (MCV1) with annual measles case counts. Each model is presented in two forms: the original specification and an adjusted version that includes country fixed effects. Across models, IRRs were generally stable following adjustment for unobserved country-level characteristics. In Models 1 and 2, C.2 and C.5 retained statistically significant associations with measles case counts in both specifications, although effect sizes were modest. MCV1 coverage was inversely associated with measles cases in the original models but attenuated to non-significance after including fixed effects. These patterns suggest that observed associations may be influenced in part by time-invariant country-level factors.

**Supplementary Table S2**. Incidence-rate ratios (IRRs) and 95% confidence intervals (CIs) for one-year versus two-year lag specifications of SPAR capacities and MCV1 coverage in Models 1-3

| **Model** | **Predictor** | **IRR (1-yr lag)** | **95% CI (1-yr)** | **p (1-yr)** | **IRR (2-yr lag)** | **95% CI (2-yr)** |
| --- | --- | --- | --- | --- | --- | --- |
| Model 1 | SPAR C.2 (laboratory capacity) | 1.01 | [1.00, 1.02] | .007 | 1.00 | [0.99, 1.01] |
|  | MCV1 coverage (%) | 0.95 | [0.92, 0.98] | < .001 | 0.93 | [0.90, 0.95] |
| Model 2 | SPAR C.5 (surveillance capacity) | 1.02 | [1.01, 1.03] | < .001 | 1.00 | [0.99, 1.01] |
|  | MCV1 coverage (%) | 0.95 | [0.92, 0.98] | < .001 | 0.93 | [0.90, 0.96] |
| Model 3 | SPAR C.2 (laboratory capacity) | 0.99 | [0.97, 1.01] | .325 | 1.00 | [0.97, 1.02] |
|  | SPAR C.5 (surveillance capacity) | 1.03 | [1.01, 1.04] | .006 | 1.01 | [0.99, 1.03] |
|  | MCV1 coverage (%) | 0.95 | [0.92, 0.98] | < .001 | 0.93 | [0.90, 0.96] |

Note**:** IRRs are exponentiated coefficients from negative binomial regression models predicting annual measles cases on SPAR laboratory capacity (C.2) and first-dose measles vaccine coverage (MCV1), comparing one-year lag (“1-yr”) versus two-year lag (“2-yr”) for the key predictors. All models control for GDP per capita (per USD 1,000), health expenditure (% GDP), year fixed effects and include an offset for total population (log scale). CI = confidence interval; IRR = incidence-rate ratio; MCV1 = first-dose measles-containing vaccine coverage; SPAR = State Party Annual Reporting.

Supplementary Table S2 shows incidence-rate ratios (IRRs) and 95% confidence intervals (CIs) from sensitivity analyses comparing one-year and two-year lag specifications for SPAR laboratory capacity (C.2), SPAR surveillance capacity (C.5), and first-dose measles vaccine coverage (MCV1). The estimated associations for SPAR predictors were slightly attenuated under the two-year lag models, with IRRs shifting closer to 1.00, suggesting weaker associations relative to the one-year lag estimates. For MCV1 coverage, the inverse association with annual measles case counts remained statistically significant across all models and both lag intervals, with IRRs of approximately 0.95 for the one-year lag and 0.93 for the two-year lag. These results suggest that the core associations are generally robust to alternative lag specifications.

**Supplementary Table S3.** DHARMa diagnostic test statistics for interaction models (4–7), showing dispersion (SD of residuals) and zero-inflation (ratio of observed to expected zeros) with p-values.

| **Model** | **Family** | **Dispersion** | ***p* (dispersion test)** | **Zero-inflation** | ***p* (ZI test)** |
| --- | --- | --- | --- | --- | --- |
| Model 4: SPAR C.5 × MCV1 | NB | 0.69 | 0.466 | 3.94 | 0.002 |
| Model 5: SPAR C.2 × MCV1 | ZINB | 1.72 | 0.242 | 1.24 | 0.596 |
| Model 6: SPAR C.5 × MCV2 | ZINB | 2.18 | 0.180 | 1.10 | 1.000 |
| Model 7: SPAR C.2 × MCV2 | ZINB | 1.60 | 0.242 | 1.07 | 1.000 |

Note*:* Dispersion test: DHARMa nonparametric test via SD of residuals (null: p > .05 means no over-dispersion/under-dispersion). Zero-inflation test: comparison of observed versus expected zeros (null: p > .05 means no excess zeros). NB = negative binomial; ZINB = zero-inflated negative binomial; SPAR = State Party Annual Reporting; MCV = measles-containing vaccine.

Supplementary Table S3 reports DHARMa diagnostic statistics for Models 4 through 7, which include interactions between SPAR indicators and measles vaccine coverage. None of the models showed statistically significant evidence of over- or under-dispersion, as all *p*-values for dispersion tests exceeded .05. Model 4 exhibited significant zero-inflation (*p* = .002), supporting the use of a zero-inflated specification in this case. In contrast, Models 5 through 7 did not show evidence of excess zeros (all *p* ≥ .596), suggesting that the negative binomial or zero-inflated negative binomial families used in these models were appropriate for the observed data structure.
