# Supplementary material for: Predictive value of IHR surveillance (C.5) and laboratory (C.2) capacities for national measles incidence: A 2011–2023 panel analysis of 14 West African countries
Source: Research Square preprint supplement (doi:10.21203/rs.3.rs-7000777/v1), 2025-07-29
Supplement: Supplementary file 1 [file f7076867a1f8b3436141f33d.pdf]

**A. Model 4: SPAR C.5 × MCV1**

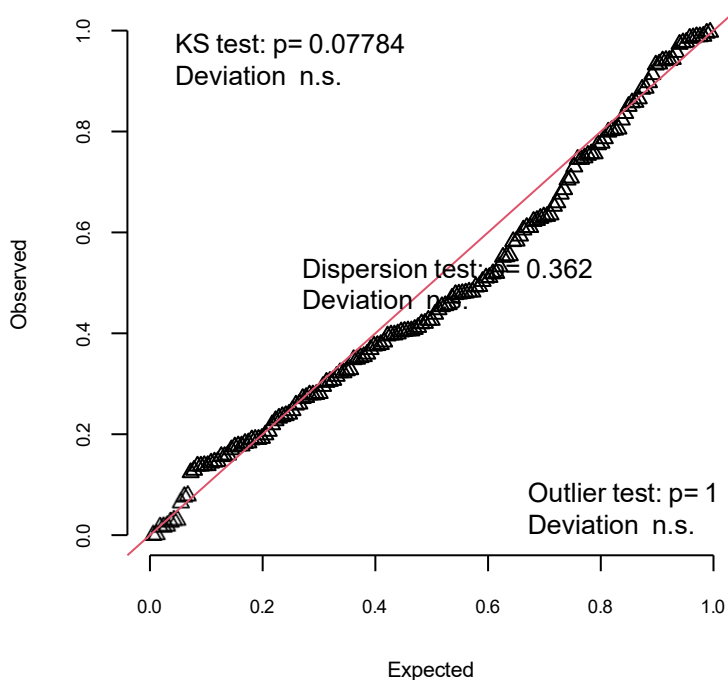

**B. Model 5: SPAR C.2 × MCV1**

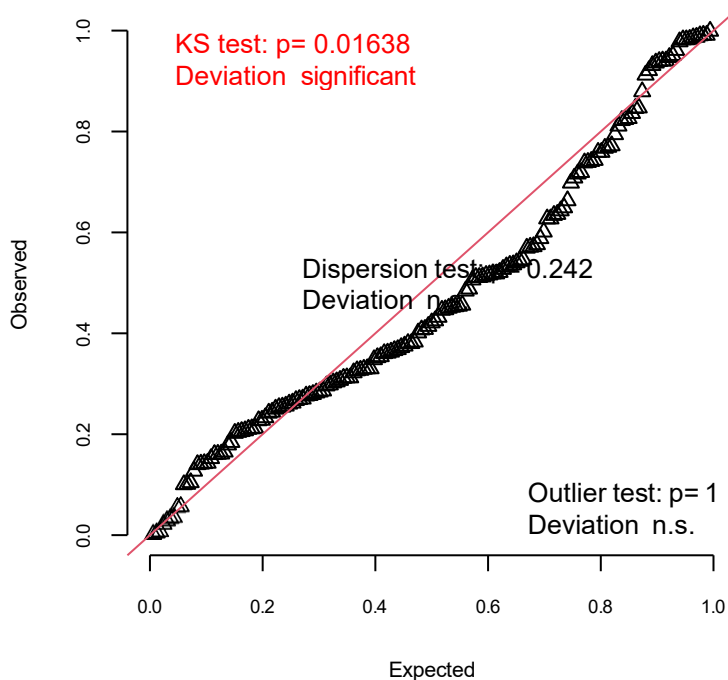

**C. Model 6: SPAR C.5 × MCV2**

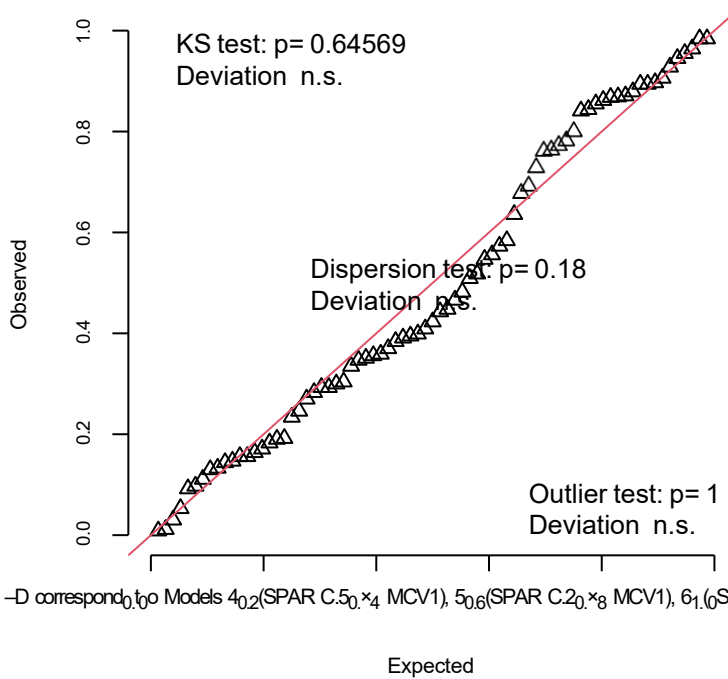

**D. Model 7: SPAR C.2 × MCV2**

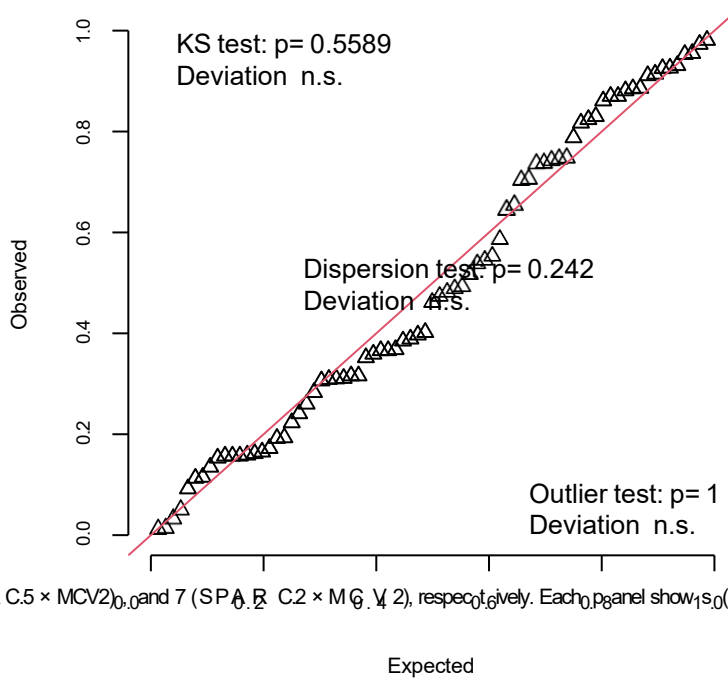

—D correspond to Models 4, 5, 6, and 7, respectively. Each panel shows a

**Supplementary Figure S1.** DHARMA residual diagnostics for interaction models 4–7. Panels A–D correspond to Models 4 (SPAR C.5 × MCV1), 5 (SPAR C.2 × MCV1), 6 (SPAR C.5 × MCV2), and 7 (SPAR C.2 × MCV2), respectively. Each panel shows (1) a QQ plot of residuals and (2) a residuals-vs.-predicted plot to assess dispersion and model fit.
