# Supplementary material for: Predictive value of IHR surveillance (C.5) and laboratory (C.2) capacities for national measles incidence: A 2011–2023 panel analysis of 14 West African countries
Source: Research Square preprint supplement (doi:10.21203/rs.3.rs-7000777/v1), 2025-07-29
Supplement: Supplementary file 2 [file bfc76d2cdbda07a97a1cd4c5.docx]

**Supplementary Analysis Code and Aggregated Data**

This supplementary file contains all scripts and datasets needed to reproduce the statistical analyses presented in "Predictive value of IHR surveillance (C.5) and laboratory (C.2) capacities for national measles incidence: A 2011–2023 panel analysis of 14 West African countries".

# ------------------------------------------------------------------------------

# analysis_main.R

# Reproducible script for:

# "Predictive value of IHR surveillance (C.5) and laboratory (C.2) capacities

# for national measles incidence: A 2011–2023 panel analysis of 14 West African countries"

# ------------------------------------------------------------------------------

# 1. Load required packages ----------------------------------------------------

library(dplyr)

library(tidyr)

library(ggplot2)

library(ggcorrplot)

library(glmmTMB)

library(broom.mixed)

library(DHARMa)

library(ggeffects)

library(car)

# 2. Import cleaned, aggregated dataset ----------------------------------------

# (Make sure analysis_dataset_updated.csv is in your working directory)

analysis_df <- readr::read_csv("analysis_dataset_updated.csv",

show_col_types = FALSE) %>%

filter(country != "Cabo Verde") %>% # exclude Cabo Verde

mutate(

country = if_else(country == "The Gambia", "Gambia", country),

gdp_pc_k = gdp_pc / 1000 # scale GDP

)

# 3. Descriptive summary (Table 2) ---------------------------------------------

table2_updated <- analysis_df %>%

mutate(incidence = measles_cases / pop_tot * 100000) %>%

group_by(country) %>%

summarise(

`Panel years` = n(),

`Years with MCV2` = sum(!is.na(coverage_mcv2)),

`Mean cases` = round(mean(measles_cases, na.rm = TRUE), 0),

`SD cases` = round(sd( measles_cases, na.rm = TRUE), 0),

`Mean incidence` = round(mean(incidence, na.rm = TRUE), 1),

`SD incidence` = round(sd( incidence, na.rm = TRUE), 1)

) %>%

ungroup()

# 4. Correlation matrix & scatterplots (Figures 1–2) ---------------------------

vars_corr <- analysis_df %>%

select(spar_C2, spar_C5, coverage_mcv1, coverage_mcv2, gdp_pc_k, pop_tot, health_pct)

corr_mat <- cor(vars_corr, use = "pairwise.complete.obs")

ggcorrplot(corr_mat, method = "circle", lab = TRUE, type = "lower") +

ggtitle("Figure 1. Correlation matrix of key predictors")

scatter_df <- analysis_df %>%

pivot_longer(c(spar_C2, spar_C5, coverage_mcv1, coverage_mcv2, gdp_pc_k, pop_tot, health_pct),

names_to = "predictor", values_to = "value")

ggplot(scatter_df, aes(x = value, y = measles_cases)) +

geom_point(alpha = 0.6) +

facet_wrap(~ predictor, scales = "free_x") +

theme_minimal() +

labs(title = "Figure 2. Bivariate scatterplots of predictors vs. measles cases")

# 5. Core models with country fixed effects (Tables 3–5) -----------------------

# Model 1: SPAR C.2 only

model1_fe <- glmmTMB(

measles_cases ~ spar_C2 + coverage_mcv1 + gdp_pc_k + health_pct +

factor(year) + factor(country) + offset(log(pop_tot)),

family = nbinom2, data = analysis_df

)

# Model 2: SPAR C.5 only

model2_fe <- update(model1_fe, . ~ . - spar_C2 + spar_C5)

# Model 3: Both C.2 + C.5

model3_fe <- glmmTMB(

measles_cases ~ spar_C2 + spar_C5 + coverage_mcv1 + gdp_pc_k + health_pct +

factor(year) + factor(country) + offset(log(pop_tot)),

family = nbinom2, data = analysis_df

)

# 6. Lag‐sensitivity analyses (Supplementary Table S2) -------------------------

analysis_lag <- analysis_df %>%

arrange(country, year) %>%

group_by(country) %>%

mutate(

spar_C2_lag2 = lag(spar_C2, 2),

spar_C5_lag2 = lag(spar_C5, 2),

coverage_mcv1_lag2 = lag(coverage_mcv1, 2)

) %>%

ungroup() %>%

filter(!is.na(spar_C2_lag2), !is.na(spar_C5_lag2), !is.na(coverage_mcv1_lag2))

mod1_nb_lag2 <- glmmTMB(

measles_cases ~ spar_C2_lag2 + coverage_mcv1_lag2 + gdp_pc_k + health_pct +

factor(year) + offset(log(pop_tot)),

family = nbinom2, data = analysis_lag

)

mod2_nb_lag2 <- update(mod1_nb_lag2, . ~ . - spar_C2_lag2 + spar_C5_lag2)

mod3_nb_lag2 <- glmmTMB(

measles_cases ~ spar_C2_lag2 + spar_C5_lag2 + coverage_mcv1_lag2 +

gdp_pc_k + health_pct + factor(year) + offset(log(pop_tot)),

family = nbinom2, data = analysis_lag

)

# 7. Multicollinearity (VIF) ---------------------------------------------------

vif_lm <- lm(

measles_cases ~ spar_C2 + spar_C5 + coverage_mcv1 + gdp_pc_k + health_pct,

data = analysis_df

)

vif_values <- vif(vif_lm)

print(vif_values) # expect all < 5

# 8. Interaction models & zero‐inflation (Tables 6–9) --------------------------

model4_zinb <- glmmTMB(

measles_cases ~ spar_C5 * coverage_mcv1 + gdp_pc_k + health_pct +

factor(year) + offset(log(pop_tot)),

ziformula = ~1, family = nbinom2, data = analysis_df

)

model5_zinb <- update(model4_zinb, . ~ spar_C2 * coverage_mcv1 + gdp_pc_k + health_pct + factor(year) + offset(log(pop_tot)))

model6_zinb <- update(model4_zinb, . ~ spar_C5 * coverage_mcv2 + gdp_pc_k + health_pct + factor(year) + offset(log(pop_tot)))

model7_zinb <- update(model4_zinb, . ~ spar_C2 * coverage_mcv2 + gdp_pc_k + health_pct + factor(year) + offset(log(pop_tot)))

# 9. DHARMa diagnostics (Supplementary Table S3 & Figure S1) -------------------

diag_list <- lapply(

list(model4_zinb, model5_zinb, model6_zinb, model7_zinb),

function(mod) {

sim <- simulateResiduals(mod, n = 1000)

tibble::tibble(

Dispersion = testDispersion(sim)$statistic,

Dispersion_p = testDispersion(sim)$p.value,

ZeroInflation = testZeroInflation(sim)$statistic,

ZeroInflation_p = testZeroInflation(sim)$p.value

)

}

)

supp_table_S3 <- bind_rows(diag_list)

# 10. Marginal effects plots (Figures 3–4) --------------------------------------

median_pop <- median(analysis_df$pop_tot, na.rm = TRUE)

me_c5_mcv1 <- ggpredict(

model4_zinb,

terms = c("spar_C5 [all]", "coverage_mcv1 [25,50,75]"),

condition = c(pop_tot = median_pop)

)

p3 <- plot(me_c5_mcv1) + theme_minimal() + ggtitle("Figure 3. SPAR C.5 × MCV1 interaction")

me_c2_mcv1 <- ggpredict(

model5_zinb,

terms = c("spar_C2 [all]", "coverage_mcv1 [25,50,75]"),

condition = c(pop_tot = median_pop)

)

p4 <- plot(me_c2_mcv1) + theme_minimal() + ggtitle("Figure 4. SPAR C.2 × MCV1 interaction")

# ------------------------------------------------------------------------------

# End of analysis script

# ------------------------------------------------------------------------------
